# Supplementary material for: Impact of Diabetes on Short-Term and Long-Term Outcomes of Ampullary Adenocarcinoma Patients after Curative Pancreatoduodenectomy
Source: MDPI journal article supplement (doi:10.3390/curroncol29100528), 2022-09-20
Supplement: s1 [file s1]

**Supplementary Table S1.** The multivariate Cox analysis of overall survival in ampullary adenocarcinoma patients.

| Variables             | HR    | 95% CI      | <i>P-value</i> |
|-----------------------|-------|-------------|----------------|
| Jaundice              |       |             |                |
| No                    |       | Reference   |                |
| Yes                   | 1.499 | 0.979-2.296 | 0.063          |
| T stage               |       |             |                |
| T1                    |       | Reference   |                |
| T2                    | 1.272 | 0.646-2.506 | 0.487          |
| T3                    | 2.463 | 0.911-6.660 | 0.076          |
| Lymph node metastasis |       |             |                |
| No                    |       | Reference   |                |
| Yes                   | 1.910 | 1.054-3.461 | 0.033          |
| TNM stage             |       |             |                |
| I                     |       | Reference   |                |
| II                    | 0.939 | 0.399-2.210 | 0.885          |
| III                   | 0.747 | 0.230-2.424 | 0.627          |
| Diabetes              |       |             |                |
| No                    |       | Reference   |                |
| Yes                   | 1.597 | 1.005-2.537 | 0.047          |

**Supplementary Table S2.** The multivariate Cox analysis of recurrence free survival in ampullary adenocarcinoma patients.

| Variables             | HR    | 95% CI      | <i>P-value</i> |
|-----------------------|-------|-------------|----------------|
| Jaundice              |       |             |                |
| No                    |       | Reference   |                |
| Yes                   | 1.563 | 0.973-2.511 | 0.065          |
| T stage               |       |             |                |
| T1                    |       | Reference   |                |
| T2                    | 1.395 | 0.635-3.065 | 0.408          |
| T3                    | 1.319 | 0.448-3.881 | 0.615          |
| Lymph node metastasis |       |             |                |
| No                    |       | Reference   |                |
| Yes                   | 1.015 | 0.506-2.035 | 0.967          |
| TNM stage             |       |             |                |
| I                     |       | Reference   |                |
| II                    | 2.372 | 0.967-5.820 | 0.059          |

|                       |      |       |             |       |
|-----------------------|------|-------|-------------|-------|
|                       | III  | 2.108 | 0.572-7.769 | 0.262 |
| Tumor size            |      |       |             |       |
|                       | ≤2cm |       | Reference   |       |
|                       | >2cm | 1.229 | 0.831-1.817 | 0.302 |
| Blood vessel invasion |      |       |             |       |
|                       | No   |       | Reference   |       |
|                       | Yes  | 1.376 | 0.850-2.228 | 0.194 |
| Diabetes              |      |       |             |       |
|                       | No   |       | Reference   |       |
|                       | Yes  | 1.768 | 1.068-2.925 | 0.027 |

---
